# Supplementary material for: Exploring pig trade patterns to inform the design of risk-based disease surveillance and control strategies
Source: PubMed Central journal article supplement (PMC4928095; doi:10.1038/srep28429), 2016-06-30
Supplement: srep28429-s1.pdf [file srep28429-s1.pdf]

**Title:** Exploring pig trade patterns to inform the design of risk-based disease surveillance and control strategies

**Author names and affiliations:** C. Guinat<sup>1,2</sup>, A. Relun<sup>3</sup>, B. Wall<sup>1</sup>, A. Morris<sup>1,4</sup>, L. Dixon<sup>2</sup>, D.U. Pfeiffer<sup>1</sup>

<sup>1</sup> Veterinary Epidemiology, Economics and Public Health Group, Royal Veterinary College, Hawkshead Lane, Hatfield, Hertfordshire, AL9 7TA, United Kingdom

<sup>2</sup> The Pirbright Institute, Ash Road, Pirbright, Surrey, GU24 0NF, United Kingdom

<sup>3</sup> Centre de coopération international en recherche agronomique pour le développement (CIRAD), Département ES, UR22, TA C22/E, Campus international de Baillarguet, 34398 Montpellier Cedex 5, France

<sup>4</sup> Department of Epidemiological Sciences, Animal and Plant Health Agency (APHA) Weybridge, Woodham Lane, Addlestone, Surrey, KT15 3NB, United Kingdom

## Supplementary Tables

Table S1. Number and type of premises over the 5-year study period (2009-2013) in Great Britain

| Year | Pig holding |                | Gathering area |                | Slaughterhouse |                | Market |                |
|------|-------------|----------------|----------------|----------------|----------------|----------------|--------|----------------|
|      | Total       | Proportion (%) | Total          | Proportion (%) | Total          | Proportion (%) | Total  | Proportion (%) |
| 2009 | 22,310      | 98.2           | 217            | 1.0            | 174            | 0.8            | 16     | 0.0            |
| 2010 | 25,303      | 98.5           | 202            | 0.8            | 166            | 0.6            | 21     | 0.1            |
| 2011 | 25,879      | 98.4           | 218            | 0.8            | 178            | 0.7            | 22     | 0.1            |
| 2012 | 22,145      | 98.6           | 147            | 0.7            | 158            | 0.7            | 6      | 0.0            |
| 2013 | 19,046      | 98.5           | 144            | 0.7            | 150            | 0.8            | 6      | 0.0            |

Table S2. Estimates of descriptive network parameters characterising the trade communities over the 5-year study period (2009-2013) in Great Britain

|                                       | Year   |        |        |        |        |
|---------------------------------------|--------|--------|--------|--------|--------|
|                                       | 2009   | 2010   | 2011   | 2012   | 2013   |
| All communities                       |        |        |        |        |        |
| Number                                | 3,437  | 3,224  | 3,911  | 3,220  | 2,756  |
| Nodes                                 | 18,611 | 21,316 | 21,095 | 17,301 | 14,726 |
| Edges                                 | 28,260 | 32,268 | 30,645 | 25,310 | 21,716 |
| Modularity                            | 0.739  | 0.743  | 0.753  | 0.766  | 0.786  |
| Holding                               | 18,379 | 21,105 | 20,867 | 17,158 | 14,583 |
| Gathering                             | 215    | 192    | 206    | 139    | 140    |
| Market                                | 17     | 19     | 22     | 4      | 3      |
| The ten largest communities           |        |        |        |        |        |
| Number                                | 10     | 10     | 10     | 10     | 10     |
| Proportion of all communities (%)     | 0.3    | 0.3    | 0.3    | 0.3    | 0.4    |
| Nodes                                 | 3,007  | 5,215  | 3,730  | 3,056  | 2,467  |
| Proportion of all community nodes (%) | 16.2   | 24.5   | 17.7   | 17.7   | 16.8   |
| Edges                                 | 5,308  | 8,903  | 6,176  | 4,294  | 3,990  |
| Proportion of all community edges (%) | 18.8   | 27.6   | 20.2   | 17.0   | 18.4   |
| Holding                               | 2,961  | 5,138  | 3,694  | 3,035  | 2,447  |
| Gathering                             | 45     | 73     | 34     | 20     | 19     |
| Market                                | 1      | 4      | 2      | 1      | 1      |
